# Supplementary material for: Associations between host gene expression, the mucosal microbiome, and clinical outcome in the pelvic pouch of patients with inflammatory bowel disease
Source: PubMed Central journal article supplement (PMC4414286; doi:10.1186/s13059-015-0637-x), 2015-04-08

**Expression Profiles MDS plot**

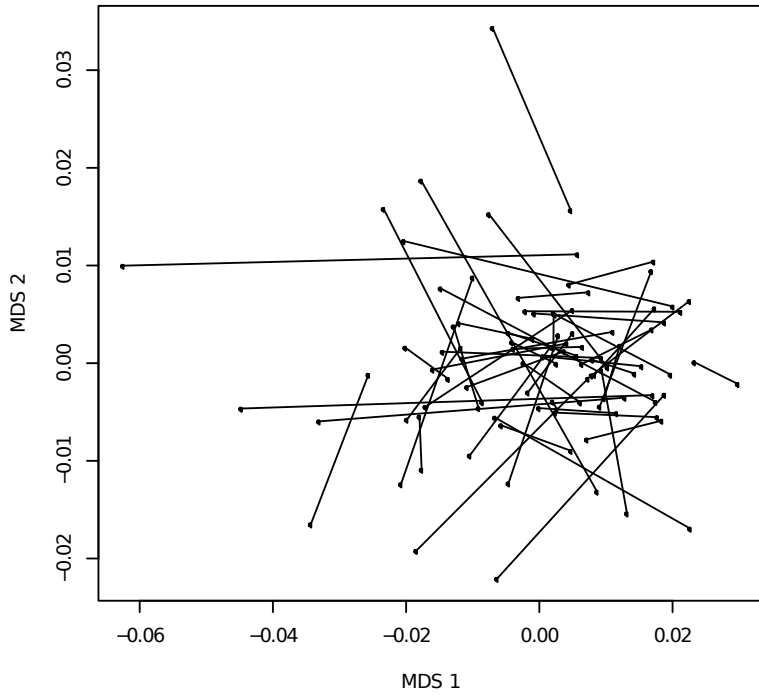

**Pearson Correlation distance between gene expression profiles**

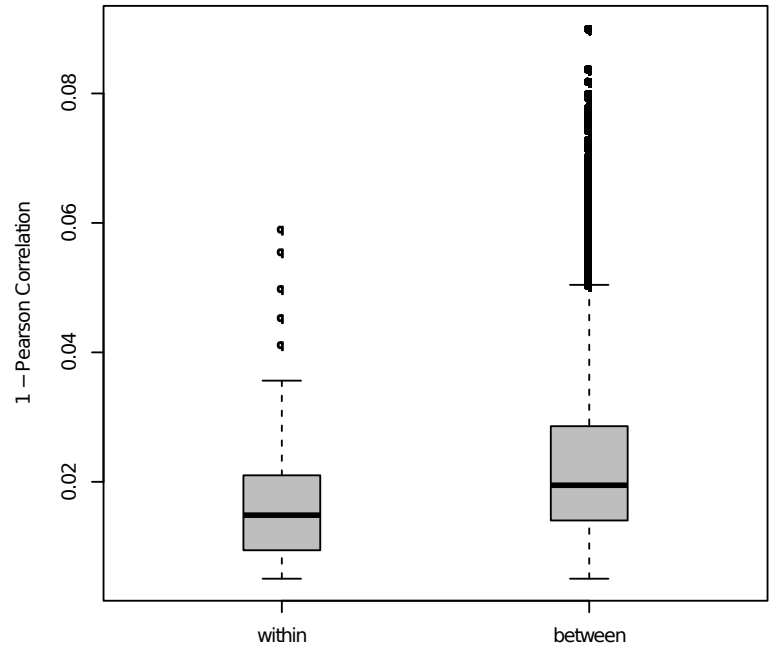

**Microbiome (Bray-Curtis Distance)**

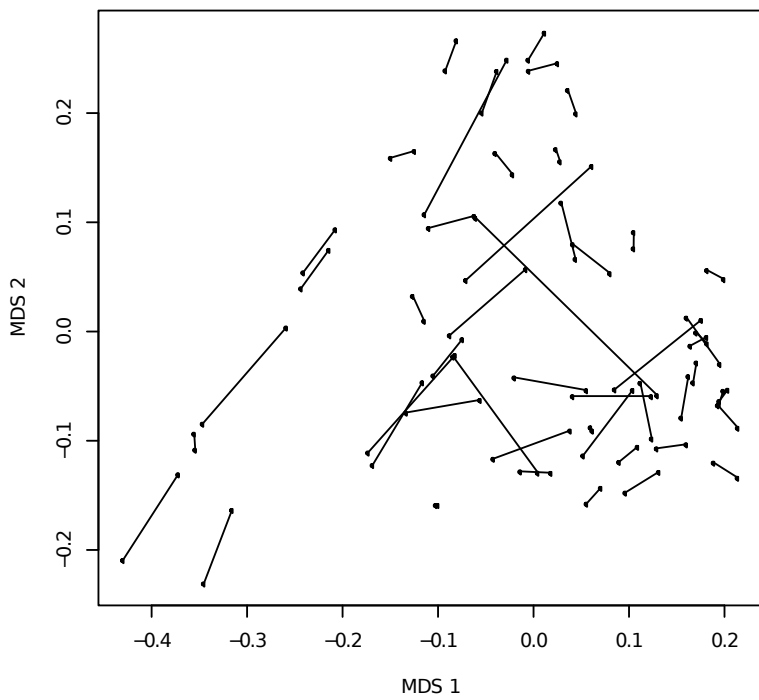

**Bray-Curtis distance between clade abundances**

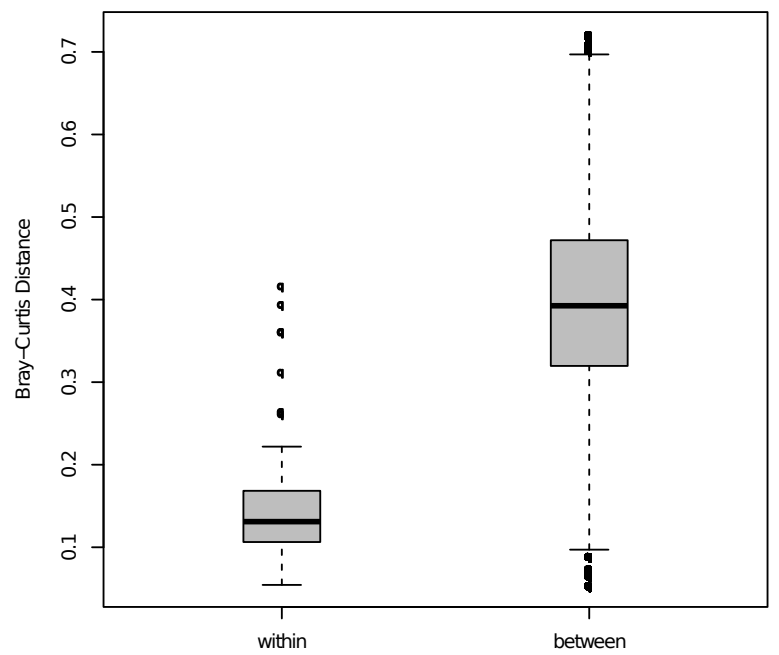

Supplement: 13059_2015_637_MOESM2_ESM.pdf [file 13059_2015_637_MOESM2_ESM.pdf]
