# Supplementary material for: Associations between host gene expression, the mucosal microbiome, and clinical outcome in the pelvic pouch of patients with inflammatory bowel disease
Source: PubMed Central journal article supplement (PMC4414286; doi:10.1186/s13059-015-0637-x), 2015-04-08

**A** ROC - Only Samples Without Antibiotics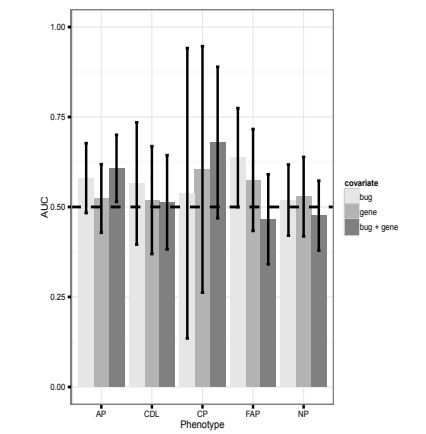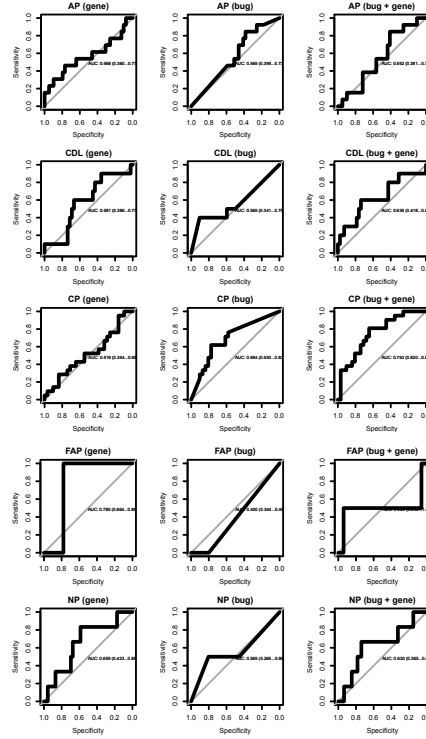**B** ROC - All Samples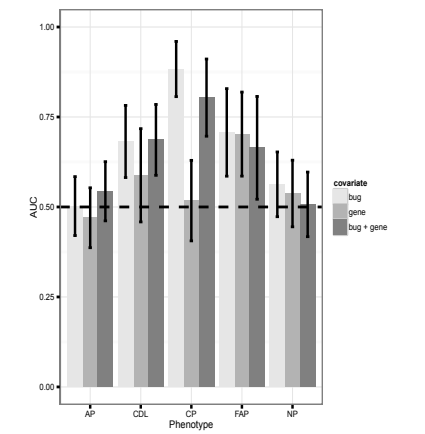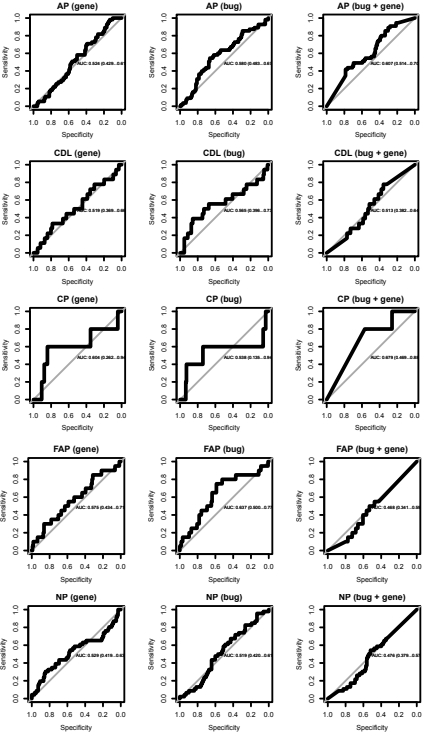**C** LD separation for genes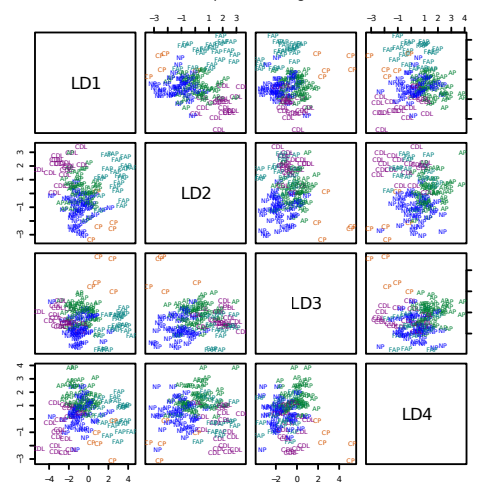

LD separation for clades

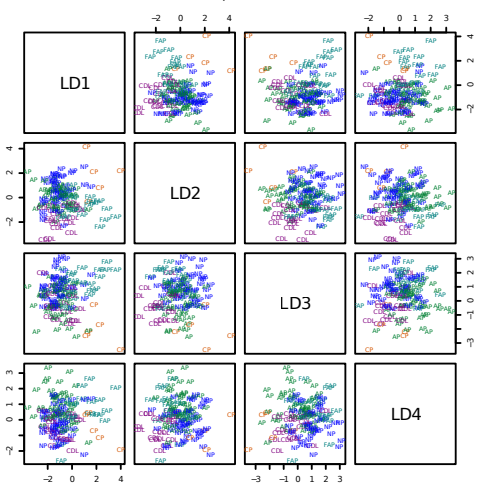**D** Linear Discriminant Loadings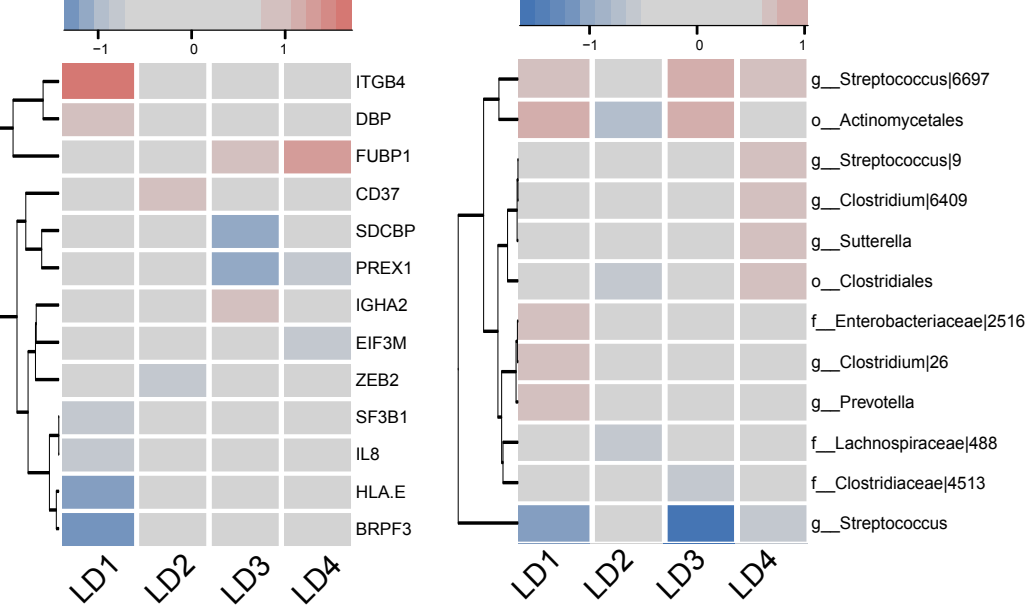

Supplement: 13059_2015_637_MOESM6_ESM.pdf [file 13059_2015_637_MOESM6_ESM.pdf]
