# Supplementary material for: Associations between host gene expression, the mucosal microbiome, and clinical outcome in the pelvic pouch of patients with inflammatory bowel disease
Source: Genome Biol. 2015 Apr 8;16(1):67. doi: 10.1186/s13059-015-0637-x (PMC4414286; doi:10.1186/s13059-015-0637-x)
Supplement: Additional file 4: Figure S3. — GOrilla analysis. GOrilla was used to measure for functional enrichment between genes differentially expressed in pouch and pre-pouch ileum (Additional file 3). There was a major difference in transporter expression between the two sites. [file 13059_2015_637_MOESM4_ESM.pdf]

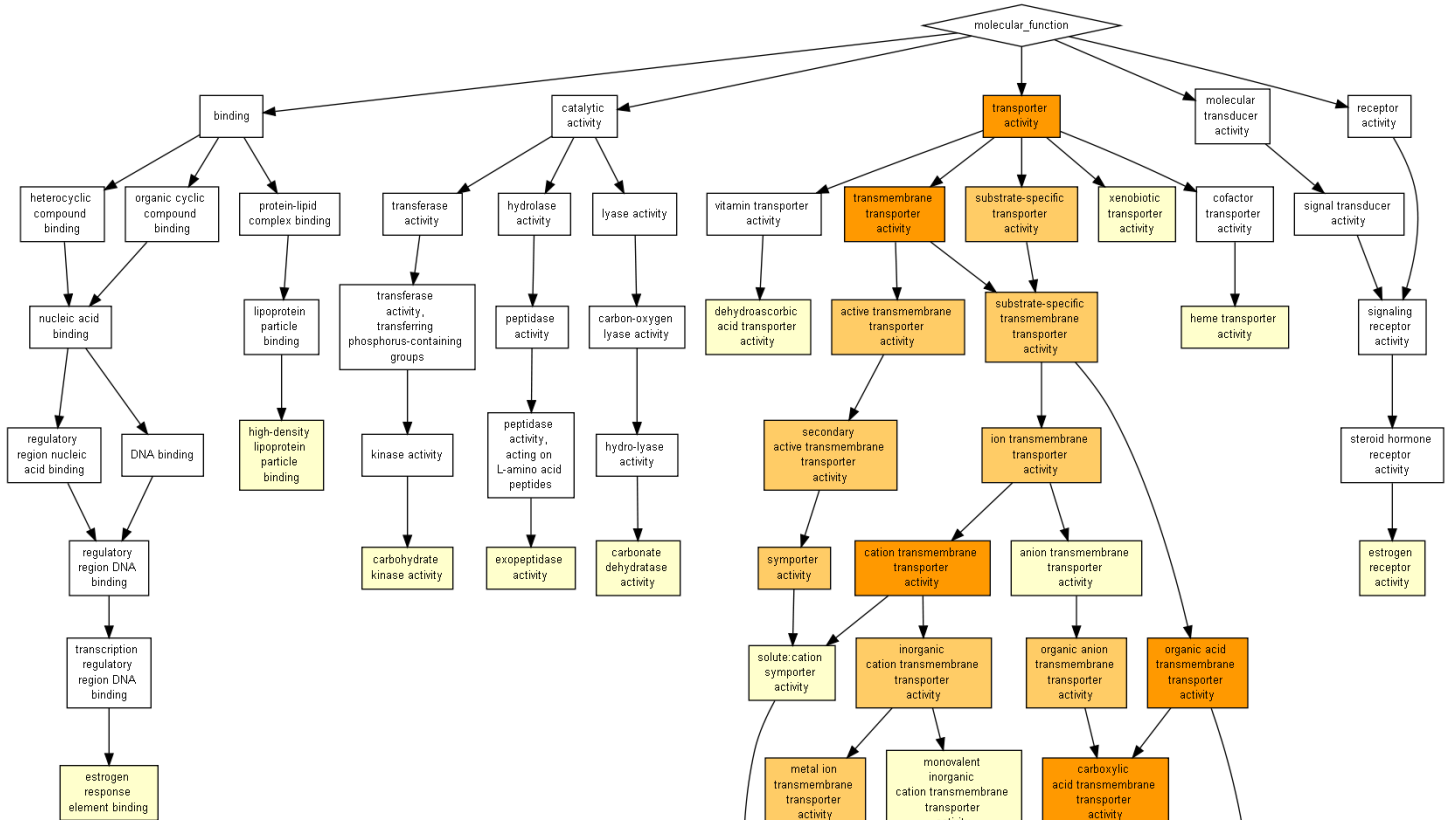

P-value color scale

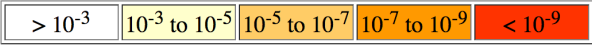

| GO term    | Description                                            | P-value | FDR q-value | Enrichment (N, B, n, b) | Genes                                             |
|------------|--------------------------------------------------------|---------|-------------|-------------------------|---------------------------------------------------|
| GO:0005215 | transporter activity                                   | 1.54E-9 | 4.98E-6     | 2.47 (8054,546,341,57)  | <a href="#">[+]</a><br><a href="#">Show genes</a> |
| GO:0022857 | transmembrane transporter activity                     | 1.61E-8 | 2.59E-5     | 1.85 (8054,416,975,93)  | <a href="#">[+]</a><br><a href="#">Show genes</a> |
| GO:0046943 | carboxylic acid transmembrane transporter activity     | 1.63E-8 | 1.75E-5     | 4.01 (8054,53,872,23)   | <a href="#">[+]</a><br><a href="#">Show genes</a> |
| GO:0008324 | cation transmembrane transporter activity              | 2.06E-8 | 1.66E-5     | 3.20 (8054,244,340,33)  | <a href="#">[+]</a><br><a href="#">Show genes</a> |
| GO:0005342 | organic acid transmembrane transporter activity        | 4.1E-8  | 2.65E-5     | 3.86 (8054,55,872,23)   | <a href="#">[+]</a><br><a href="#">Show genes</a> |
| GO:0008514 | organic anion transmembrane transporter activity       | 1.17E-7 | 6.32E-5     | 3.18 (8054,74,957,28)   | <a href="#">[+]</a><br><a href="#">Show genes</a> |
| GO:0022891 | substrate-specific transmembrane transporter activity  | 2.03E-7 | 9.37E-5     | 1.89 (8054,372,884,77)  | <a href="#">[+]</a><br><a href="#">Show genes</a> |
| GO:0022804 | active transmembrane transporter activity              | 3.15E-7 | 1.27E-4     | 2.37 (8054,154,925,42)  | <a href="#">[+]</a><br><a href="#">Show genes</a> |
| GO:0022892 | substrate-specific transporter activity                | 5.04E-7 | 1.81E-4     | 2.40 (8054,434,340,44)  | <a href="#">[+]</a><br><a href="#">Show genes</a> |
| GO:0015075 | ion transmembrane transporter activity                 | 7.85E-7 | 2.53E-4     | 1.89 (8054,338,884,70)  | <a href="#">[+]</a><br><a href="#">Show genes</a> |
| GO:0046873 | metal ion transmembrane transporter activity           | 1.04E-6 | 3.05E-4     | 3.06 (8054,165,430,27)  | <a href="#">[+]</a><br><a href="#">Show genes</a> |
| GO:0015291 | secondary active transmembrane transporter activity    | 1.29E-6 | 3.46E-4     | 2.73 (8054,99,923,31)   | <a href="#">[+]</a><br><a href="#">Show genes</a> |
| GO:0015293 | symporter activity                                     | 2.4E-6  | 5.96E-4     | 2.95 (8054,77,923,26)   | <a href="#">[+]</a><br><a href="#">Show genes</a> |
| GO:0022890 | inorganic cation transmembrane transporter activity    | 2.47E-6 | 5.7E-4      | 2.83 (8054,186,444,29)  | <a href="#">[+]</a><br><a href="#">Show genes</a> |
| GO:0015171 | amino acid transmembrane transporter activity          | 2.78E-6 | 6E-4        | 4.10 (8054,36,872,16)   | <a href="#">[+]</a><br><a href="#">Show genes</a> |
| GO:0015081 | sodium ion transmembrane transporter activity          | 6.04E-4 | 6.5E-2      | 3.75 (8054,60,430,12)   | <a href="#">[+]</a><br><a href="#">Show genes</a> |
| GO:0015179 | L-amino acid transmembrane transporter activity        | 6.73E-4 | 7.02E-2     | 3.89 (8054,25,829,10)   | <a href="#">[+]</a><br><a href="#">Show genes</a> |
| GO:0005343 | organic acid:sodium symporter activity                 | 8.1E-4  | 8.17E-2     | 5.08 (8054,14,793,7)    | <a href="#">[+]</a><br><a href="#">Show genes</a> |
| GO:0072349 | modified amino acid transmembrane transporter activity | 8.97E-4 | 8.78E-2     | 6.60 (8054,7,872,5)     | <a href="#">[+]</a><br><a href="#">Show genes</a> |

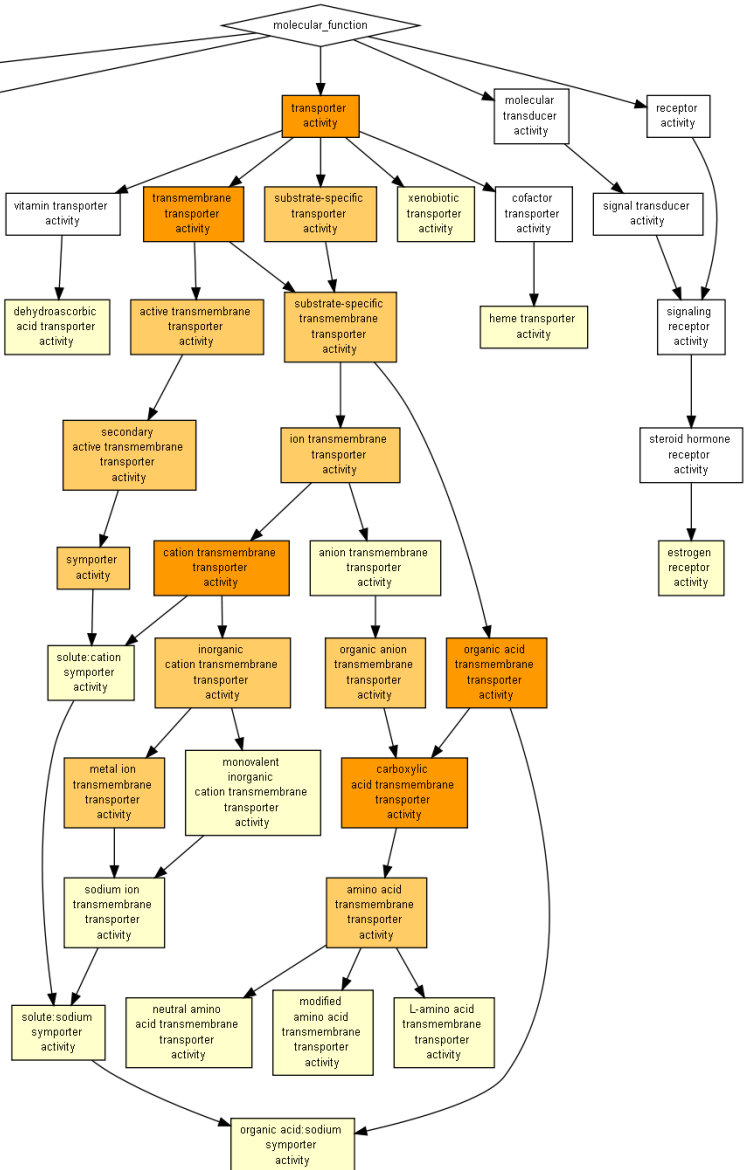

|            |                                                                |         |         |                        |                                                   |
|------------|----------------------------------------------------------------|---------|---------|------------------------|---------------------------------------------------|
| GO:0015077 | monovalent inorganic cation transmembrane transporter activity | 2.25E-5 | 4.55E-3 | 3.12 (8054,128,444,22) | <a href="#">[+]</a><br><a href="#">Show genes</a> |
| GO:0015370 | solute:sodium symporter activity                               | 2.62E-5 | 4.98E-3 | 4.51 (8054,27,793,12)  | <a href="#">[+]</a><br><a href="#">Show genes</a> |
| GO:0015294 | solute:cation symporter activity                               | 3.58E-5 | 6.42E-3 | 6.16 (8054,49,267,10)  | <a href="#">[+]</a><br><a href="#">Show genes</a> |
| GO:0008509 | anion transmembrane transporter activity                       | 5.01E-5 | 8.52E-3 | 2.24 (8054,128,957,34) | <a href="#">[+]</a><br><a href="#">Show genes</a> |
| GO:0034056 | estrogen response element binding                              | 1.05E-4 | 1.69E-2 | 153.41 (8054,3,35,2)   | <a href="#">[+]</a><br><a href="#">Show genes</a> |
| GO:0004089 | carbonate dehydratase activity                                 | 1.77E-4 | 2.73E-2 | 7.68 (8054,10,629,6)   | <a href="#">[+]</a><br><a href="#">Show genes</a> |
| GO:0042910 | xenobiotic transporter activity                                | 2.15E-4 | 3.15E-2 | 20.76 (8054,3,388,3)   | <a href="#">[+]</a><br><a href="#">Show genes</a> |
| GO:0019200 | carbohydrate kinase activity                                   | 2.49E-4 | 3.5E-2  | 6.22 (8054,14,647,7)   | <a href="#">[+]</a><br><a href="#">Show genes</a> |
| GO:0015175 | neutral amino acid transmembrane transporter activity          | 2.54E-4 | 3.42E-2 | 5.25 (8054,16,767,8)   | <a href="#">[+]</a><br><a href="#">Show genes</a> |
| GO:0033300 | dehydroascorbic acid transporter activity                      | 2.8E-4  | 3.62E-2 | 18.95 (8054,3,425,3)   | <a href="#">[+]</a><br><a href="#">Show genes</a> |
| GO:0008035 | high-density lipoprotein particle binding                      | 2.99E-4 | 3.72E-2 | 24.86 (8054,4,243,3)   | <a href="#">[+]</a><br><a href="#">Show genes</a> |
| GO:0030284 | estrogen receptor activity                                     | 3.12E-4 | 3.74E-2 | 115.06 (8054,4,35,2)   | <a href="#">[+]</a><br><a href="#">Show genes</a> |
| GO:0008238 | exopeptidase activity                                          | 3.53E-4 | 4.08E-2 | 4.25 (8054,54,386,11)  | <a href="#">[+]</a><br><a href="#">Show genes</a> |
| GO:0015232 | heme transporter activity                                      | 5.22E-4 | 5.82E-2 | 25.17 (8054,6,160,3)   | <a href="#">[+]</a><br><a href="#">Show genes</a> |
